# Supplementary material
Source: MDPI journal article supplement (https://www.mdpi.com/2076-3417/13/1/103)
Supplement: s1 [file s1 › applsci-2065629-supplementary.pdf]

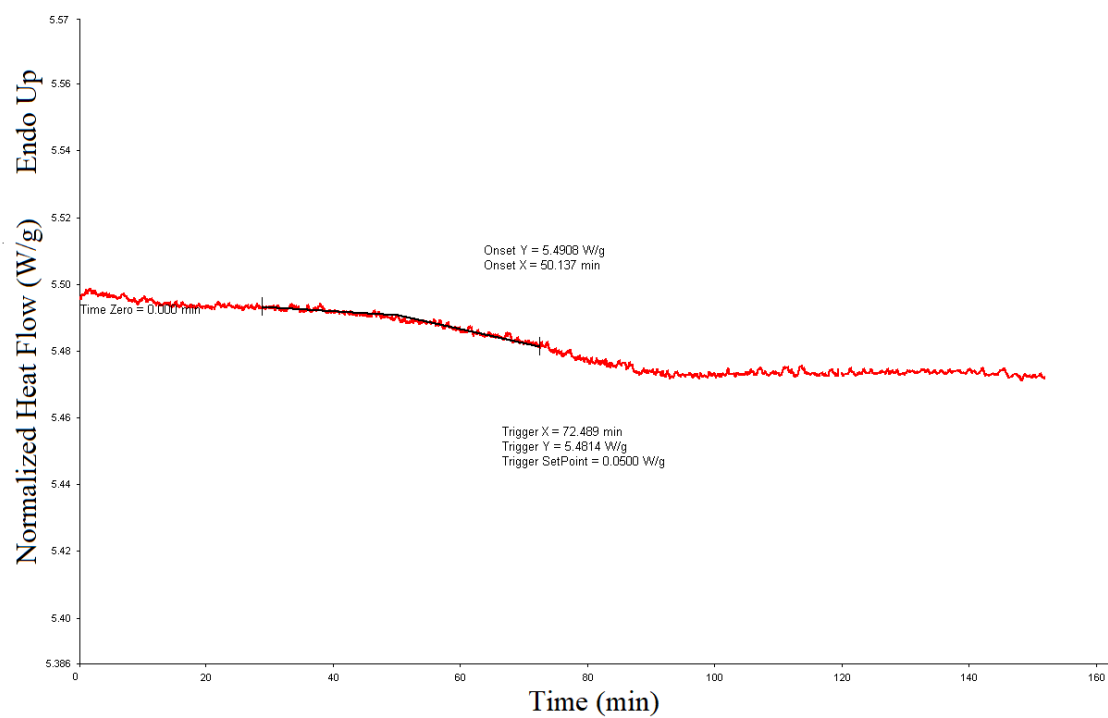

**Figure S1.** Differential scanning calorimetry (DSC) oxidation induction time (OIT) curve measured for fresh HORO sample at 120 °C temperature.
